# Supplementary material for: Association of Oophorectomy and Fat and Lean Body Mass: Evidence from a Population-Based Sample of U.S. Women
Source: Oxford University Press journal article supplement (doi:10.1158/1055-9965.epi-20-1849), 2021-04-20
Supplement: 10559965epi201849-sup-258140_2_supp_7023245_qqq63q.docx [file 10559965epi201849-sup-258140_2_supp_7023245_qqq63q.docx]

**Supplementary Table 5.** Age-adjusted prevalence of high total fat and low total lean body mass among women with hysterectomy with and without oophorectomy by physical activity and post-surgery estrogen replacement therapy use

| **Subgroup** | **Hysterectomy** | | | **Hysterectomy & Oophorectomy** | | |
| --- | --- | --- | --- | --- | --- | --- |
| **n** | **Prevalence (95% CI)** | ***P* value*** | **n** | **Prevalence (95% CI)** | ***P* value*** |
| **Physical activity** |  |  |  |  |  |  |
| None | 225 | 40.5% (32.9%-48.1%) | -- | 260 | 54.7% (49.4%-60.1%) | -- |
| Moderate | 142 | 39.6% (31.4%-47.8%) | 0.859 | 185 | 43.2% (35.5%-50.8%) | 0.124 |
| Vigorous | 78 | 32.0% (17.7%-46.3%) | 0.331 | 107 | 32.3% (22.1%-42.4%) | <0.001 |
| **Post-surgery ERT use** |  |  |  |  |  |  |
| No | 344 | 38.4% (32.5%-44.3%) | -- | 205 | 47.8% (38.1%-57.4%) | -- |
| Yes | 101 | 39.2% (25.0%-53.4%) | 0.915 | 347 | 44.4% (29.5%-49.4%) | 0.542 |

Abbreviations: ERT, estrogen replacement therapy; CI, confidence interval. High total fat mass and low total lean body mass defined as total fat mass ≥43.7% (tertile 3) and total lean mass <53.7% (tertile 1). Tertile cut points are based on values among women without a history of hysterectomy and oophorectomy. **P*-values for absolute differences in prevalence; reference groups: no physical activity and no post-surgery ERT use.
